# Supplementary material for: Meioc maintains an extended meiotic prophase I in mice
Source: PLoS Genet. 2017 Apr 5;13(4):e1006704. doi: 10.1371/journal.pgen.1006704 (PMC5397071; doi:10.1371/journal.pgen.1006704)
Supplement: S2 Table — (XLSX) [file pgen.1006704.s013.xlsx]

## Sheet: DAVID_GOenrichments_Down4.txt
Category	Term	Count	%	PValue	Genes	List Total	Pop Hits	Pop Total	Fold Enrichment	Bonferroni	Benjamini	FDR
GOTERM_BP_FAT	GO:0022402~cell cycle process	27	5.74468	6.08331e-06	SYCP2, SYCP1, MLF1, MEI1, CDKN2A, KRT7, NPM1, STAG3, TERF1, ANP32B, MSH5, SKP2, SYCE2, SYCE1, SIRT7, RBBP8, SPDYA, MFN2, PRDM9, SYCP3, SGSM3, FTSJD2, HORMAD1, HORMAD2, HAUS8, DMC1, SMC1B	340	393	13588	2.74567	0.00980056	0.00980056	0.0102005
GOTERM_BP_FAT	GO:0007049~cell cycle	34	7.23404	2.52754e-05	EID1, MAEA, SYCP2, SYCP1, MLF1, MEI1, CDKN2A, KRT7, NPM1, STAG3, TERF1, ANP32B, MSH5, SKP2, SYCE2, SYCE1, SIRT7, STRADB, ESCO2, RBBP8, SPDYA, MFN2, PRDM9, SYCP3, SGSM3, FTSJD2, CDK11B, HORMAD1, HORMAD2, HAUS8, DMC1, CALM2, SMC1B, SEPT9	340	611	13588	2.2239	0.0400955	0.0202528	0.0423754
GOTERM_BP_FAT	GO:0007126~meiosis	11	2.34043	6.57267e-05	MEI1, PRDM9, SYCP3, MSH5, SYCE2, STAG3, SYCE1, SYCP2, DMC1, SYCP1, SMC1B	340	88	13588	4.99559	0.100949	0.0348499	0.110159
GOTERM_BP_FAT	GO:0051327~M phase of meiotic cell cycle	11	2.34043	6.57267e-05	MEI1, PRDM9, SYCP3, MSH5, SYCE2, STAG3, SYCE1, SYCP2, DMC1, SYCP1, SMC1B	340	88	13588	4.99559	0.100949	0.0348499	0.110159
GOTERM_BP_FAT	GO:0022403~cell cycle phase	22	4.68085	7.74846e-05	ANP32B, MSH5, SKP2, SYCE2, SYCE1, SIRT7, SYCP2, SYCP1, RBBP8, SPDYA, MEI1, PRDM9, SYCP3, KRT7, FTSJD2, STAG3, HORMAD1, HAUS8, HORMAD2, DMC1, SMC1B, TERF1	340	328	13588	2.68056	0.117902	0.0308764	0.129853
GOTERM_BP_FAT	GO:0051321~meiotic cell cycle	11	2.34043	7.97146e-05	MEI1, PRDM9, SYCP3, MSH5, SYCE2, STAG3, SYCE1, SYCP2, DMC1, SYCP1, SMC1B	340	90	13588	4.88458	0.121082	0.0254823	0.133588
GOTERM_BP_FAT	GO:0051186~cofactor metabolic process	15	3.19149	0.000190314	ALAD, ACO2, PGD, CS, UROS, PPOX, ACSS2, SDHA, ALAS2, ANK1, MTR, TXNRD3, CSL, SCP2, MGST1	340	182	13588	3.29379	0.265193	0.0500614	0.318655
GOTERM_BP_FAT	GO:0007127~meiosis I	7	1.48936	0.000203144	PRDM9, SYCP3, MSH5, SYCE2, SYCE1, DMC1, SYCP1	340	35	13588	7.99294	0.280302	0.0459021	0.340102
GOTERM_BP_FAT	GO:0070192~chromosome organization involved in meiosis	5	1.06383	0.000700279	SYCP3, MSH5, SYCE2, SYCE1, SYCP1	340	17	13588	11.7543	0.678304	0.132178	1.16782
GOTERM_BP_FAT	GO:0007129~synapsis	5	1.06383	0.000700279	SYCP3, MSH5, SYCE2, SYCE1, SYCP1	340	17	13588	11.7543	0.678304	0.132178	1.16782
GOTERM_BP_FAT	GO:0033014~tetrapyrrole biosynthetic process	5	1.06383	0.000882781	ALAD, ANK1, ALAS2, UROS, PPOX	340	18	13588	11.1013	0.760656	0.146895	1.47006
GOTERM_BP_FAT	GO:0006779~porphyrin biosynthetic process	5	1.06383	0.000882781	ALAD, ANK1, ALAS2, UROS, PPOX	340	18	13588	11.1013	0.760656	0.146895	1.47006
GOTERM_BP_FAT	GO:0007130~synaptonemal complex assembly	4	0.851064	0.00115615	SYCP3, SYCE2, SYCE1, SYCP1	340	9	13588	17.7621	0.84632	0.170796	1.92114
GOTERM_BP_FAT	GO:0070193~synaptonemal complex organization	4	0.851064	0.00162122	SYCP3, SYCE2, SYCE1, SYCP1	340	10	13588	15.9859	0.927697	0.212434	2.68412
GOTERM_BP_FAT	GO:0000279~M phase	17	3.61702	0.00203159	MSH5, SYCE2, SYCE1, SIRT7, SYCP2, SYCP1, MEI1, PRDM9, SYCP3, FTSJD2, STAG3, HORMAD1, HORMAD2, HAUS8, DMC1, SMC1B, TERF1	340	283	13588	2.40071	0.962839	0.239952	3.35269
GOTERM_BP_FAT	GO:0001824~blastocyst development	7	1.48936	0.00217318	MFN2, SETDB1, SBDS, PSMC4, CDK11B, RBBP8, CITED2	340	54	13588	5.18061	0.970466	0.237337	3.58238
GOTERM_BP_FAT	GO:0015671~oxygen transport	4	0.851064	0.00218819	HBA-A2, HBB-BH1, HBA-X, HBB-Y	340	11	13588	14.5326	0.971176	0.223785	3.60669
GOTERM_BP_FAT	GO:0046907~intracellular transport	22	4.68085	0.00274117	NUP133, SRP14, AP1M1, NRBP1, IPO13, SNUPN, VTI1B, SNX1, MYO9B, TIMM13, STRADB, FLNA, AIP, MFN2, KIF1C, WDR19, VCP, DDX25, NPM1, HGS, GOLGA5, TRAPPC3	340	431	13588	2.03996	0.988252	0.256413	4.49859
GOTERM_BP_FAT	GO:0015669~gas transport	4	0.851064	0.00365488	HBA-A2, HBB-BH1, HBA-X, HBB-Y	340	13	13588	12.2968	0.997336	0.309615	5.95531
GOTERM_BP_FAT	GO:0006783~heme biosynthetic process	4	0.851064	0.00365488	ALAD, ALAS2, UROS, PPOX	340	13	13588	12.2968	0.997336	0.309615	5.95531
GOTERM_BP_FAT	GO:0007128~meiotic prophase I	4	0.851064	0.00365488	PRDM9, SYCE2, SYCE1, DMC1	340	13	13588	12.2968	0.997336	0.309615	5.95531
GOTERM_BP_FAT	GO:0051324~prophase	4	0.851064	0.00365488	PRDM9, SYCE2, SYCE1, DMC1	340	13	13588	12.2968	0.997336	0.309615	5.95531
GOTERM_BP_FAT	GO:0033013~tetrapyrrole metabolic process	5	1.06383	0.00368581	ALAD, ANK1, ALAS2, UROS, PPOX	340	26	13588	7.68552	0.997467	0.296486	6.00426
GOTERM_BP_FAT	GO:0006778~porphyrin metabolic process	5	1.06383	0.00368581	ALAD, ANK1, ALAS2, UROS, PPOX	340	26	13588	7.68552	0.997467	0.296486	6.00426
GOTERM_BP_FAT	GO:0010608~posttranscriptional regulation of gene expression	11	2.34043	0.00398916	SRP14, MOV10, CDKN2A, KRT7, DDX25, MEX3D, ANKHD1, PPP1R15A, EIF4E2, FLNA, PAIP2B	340	148	13588	2.97035	0.998453	0.301989	6.48302
GOTERM_BP_FAT	GO:0048821~erythrocyte development	4	0.851064	0.00677069	HBA-A2, ANK1, MAEA, HBA-X	340	16	13588	9.99118	0.999983	0.439483	10.7673
GOTERM_BP_FAT	GO:0042254~ribosome biogenesis	9	1.91489	0.00694787	SBDS, CDKN2A, WDR55, SURF6, FRG1, RPLP0, NPM1, MPHOSPH10, POP4	340	112	13588	3.21145	0.999987	0.431295	11.0338
GOTERM_BP_FAT	GO:0006084~acetyl-CoA metabolic process	5	1.06383	0.0070358	SDHA, ACO2, CS, CSL, ACSS2	340	31	13588	6.44592	0.999989	0.419777	11.1658
GOTERM_BP_FAT	GO:0022613~ribonucleoprotein complex biogenesis	10	2.12766	0.00738778	EIF3D, SBDS, CDKN2A, WDR55, SURF6, FRG1, RPLP0, NPM1, MPHOSPH10, POP4	340	137	13588	2.91713	0.999994	0.420559	11.6924
GOTERM_BP_FAT	GO:0006732~coenzyme metabolic process	10	2.12766	0.00966301	SDHA, ACO2, PGD, CS, MTR, TXNRD3, CSL, ACSS2, SCP2, MGST1	340	143	13588	2.79473	1	0.495153	15.026
GOTERM_BP_FAT	GO:0080135~regulation of cellular response to stress	7	1.48936	0.0109726	MDFI, CDKN2A, NPM1, FTSJD2, MUL1, UIMC1, AKT2	340	75	13588	3.73004	1	0.524927	16.8908
GOTERM_BP_FAT	GO:0007140~male meiosis	4	0.851064	0.0110866	MEI1, STAG3, SYCP2, DMC1	340	19	13588	8.41362	1	0.514211	17.0513
GOTERM_BP_FAT	GO:0042168~heme metabolic process	4	0.851064	0.0110866	ALAD, ALAS2, UROS, PPOX	340	19	13588	8.41362	1	0.514211	17.0513
GOTERM_BP_FAT	GO:0033554~cellular response to stress	19	4.04255	0.0129485	MDFI, MSH5, MUL1, ATR, STRADB, XRCC1, ESCO2, UIMC1, GTF2H1, RBX1, SPDYA, GPX1, LAMB2, FTSJD2, DYRK2, DMC1, SCARA5, PPP1R15A, FEN1	340	404	13588	1.87953	1	0.555835	19.6316
GOTERM_BP_FAT	GO:0006457~protein folding	9	1.91489	0.0142463	FKBP9, DNAJB11, FKBP6, FKBP5, CALR3, PDRG1, CALR, QSOX1, AIP	340	127	13588	2.83214	1	0.577006	21.3853
GOTERM_BP_FAT	GO:0019953~sexual reproduction	18	3.82979	0.0170029	ZFP541, SHBG, MSH5, TSNAX, FIGLA, MTL5, ITGA3, SYCP2, SPA17, TAF7L, MEI1, WNT4, SYCP3, DDX25, D1PAS1, TXNRD3, DMC1, SPATA5	340	386	13588	1.86364	1	0.629013	24.9916
GOTERM_BP_FAT	GO:0055114~oxidation reduction	27	5.74468	0.0176836	PTGR1, CTBP1, CYB5R1, AIFM1, NDUFB9, MAOA, PGD, DHRS11, FDXR, PRDX5, FADS2, PPOX, NUP188, NDUFA10, ACADL, PHYH, DHRS7, SDHA, ACADVL, GPX1, NNT, ALDH1A3, TXNRD3, HSD17B4, HADH, QSOX1, GFOD2	340	672	13588	1.60572	1	0.630671	25.8579
GOTERM_BP_FAT	GO:0034613~cellular protein localization	15	3.19149	0.0180903	SRP14, AP1M1, IPO13, SNUPN, SNX1, VTI1B, TIMM13, STRADB, OPTN, FLNA, AIP, MFN2, WDR19, VCP, HGS	340	299	13588	2.00492	1	0.62664	26.3709
GOTERM_BP_FAT	GO:0006099~tricarboxylic acid cycle	4	0.851064	0.0188315	SDHA, ACO2, CS, CSL	340	23	13588	6.95038	1	0.629488	27.2973
GOTERM_BP_FAT	GO:0070727~cellular macromolecule localization	15	3.19149	0.0191654	SRP14, AP1M1, IPO13, SNUPN, SNX1, VTI1B, TIMM13, STRADB, OPTN, FLNA, AIP, MFN2, WDR19, VCP, HGS	340	301	13588	1.9916	1	0.624337	27.7111
GOTERM_BP_FAT	GO:0007062~sister chromatid cohesion	3	0.638298	0.0198959	SYCP3, STAG3, SMC1B	340	9	13588	13.3216	1	0.626913	28.6086
GOTERM_BP_FAT	GO:0046356~acetyl-CoA catabolic process	4	0.851064	0.0211325	SDHA, ACO2, CS, CSL	340	24	13588	6.66078	1	0.638345	30.1042
GOTERM_BP_FAT	GO:0008104~protein localization	29	6.17021	0.0227262	SRP14, AP1M1, TLN1, SNX1, NUP188, TIMM13, LSR, AIP, WDR19, NUP210, NPM1, VPS39, TNPO3, NUP133, RAB8A, IPO13, SNUPN, ERP29, VTI1B, STRADB, CELSR1, OPTN, FLNA, MFN2, VCP, RAB22A, HGS, TOMM22, GNB2L1	340	753	13588	1.53915	1	0.654712	31.9881
GOTERM_BP_FAT	GO:0016567~protein ubiquitination	6	1.2766	0.0242762	MIB1, AURKAIP1, SKP2, FTSJD2, MUL1, RBX1	340	66	13588	3.63316	1	0.668863	33.7745
GOTERM_BP_FAT	GO:0030866~cortical actin cytoskeleton organization	3	0.638298	0.0244645	CORO1C, TLN1, CALR	340	10	13588	11.9894	1	0.661693	33.9885
GOTERM_BP_FAT	GO:0051276~chromosome organization	18	3.82979	0.0253696	SETDB1, AIFM1, MSH5, SYCE2, SYCE1, SYCP1, UIMC1, SUV420H2, PRDM9, SYCP3, PHF16, FTSJD2, STAG3, ASF1B, RNF20, TOP2A, SMC1B, TERF1	340	404	13588	1.78061	1	0.665402	35.008
GOTERM_BP_FAT	GO:0051188~cofactor biosynthetic process	7	1.48936	0.0261746	ALAD, ANK1, ALAS2, MTR, UROS, PPOX, ACSS2	340	91	13588	3.07421	1	0.66748	35.9024
GOTERM_BP_FAT	GO:0051168~nuclear export	4	0.851064	0.028917	NUP133, DDX25, NPM1, STRADB	340	27	13588	5.9207	1	0.69507	38.863
GOTERM_BP_FAT	GO:0009060~aerobic respiration	4	0.851064	0.028917	SDHA, ACO2, CS, CSL	340	27	13588	5.9207	1	0.69507	38.863
GOTERM_BP_FAT	GO:0030218~erythrocyte differentiation	5	1.06383	0.0313233	HBA-A2, ANK1, ALAS2, MAEA, HBA-X	340	48	13588	4.16299	1	0.715401	41.3543
GOTERM_BP_FAT	GO:0003006~reproductive developmental process	13	2.76596	0.033565	SHBG, TNC, SYCP2, TAF7L, CITED2, MEI1, WNT4, DMRTC2, DDX25, ASB1, EPOR, HSD17B4, DMC1	340	264	13588	1.96796	1	0.731811	43.589
GOTERM_BP_FAT	GO:0009109~coenzyme catabolic process	4	0.851064	0.0348372	SDHA, ACO2, CS, CSL	340	29	13588	5.51237	1	0.736855	44.8214
GOTERM_BP_FAT	GO:0018130~heterocycle biosynthetic process	5	1.06383	0.0379835	ALAD, ANK1, ALAS2, UROS, PPOX	340	51	13588	3.91811	1	0.759457	47.7614
GOTERM_BP_FAT	GO:0051325~interphase	5	1.06383	0.0379835	SPDYA, ANP32B, KRT7, SKP2, RBBP8	340	51	13588	3.91811	1	0.759457	47.7614
GOTERM_BP_FAT	GO:0034101~erythrocyte homeostasis	5	1.06383	0.0379835	HBA-A2, ANK1, ALAS2, MAEA, HBA-X	340	51	13588	3.91811	1	0.759457	47.7614
GOTERM_BP_FAT	GO:0046148~pigment biosynthetic process	4	0.851064	0.0380137	ALAD, ALAS2, UROS, PPOX	340	30	13588	5.32863	1	0.751998	47.7889
GOTERM_BP_FAT	GO:0032774~RNA biosynthetic process	8	1.70213	0.0384462	CCDC111, CDKN2A, TAF4B, TAF9B, TBP, SIRT7, TAF7L, GTF2H1	340	126	13588	2.53744	1	0.748381	48.1811
GOTERM_BP_FAT	GO:0007276~gamete generation	15	3.19149	0.0386965	SHBG, ZFP541, MSH5, TSNAX, FIGLA, MTL5, TAF7L, MEI1, WNT4, SYCP3, DDX25, D1PAS1, TXNRD3, DMC1, SPATA5	340	331	13588	1.81109	1	0.743197	48.4069
GOTERM_BP_FAT	GO:0006417~regulation of translation	7	1.48936	0.0389837	SRP14, KRT7, DDX25, ANKHD1, PPP1R15A, EIF4E2, PAIP2B	340	100	13588	2.79753	1	0.738469	48.6647
GOTERM_BP_FAT	GO:0030865~cortical cytoskeleton organization	3	0.638298	0.0403741	CORO1C, TLN1, CALR	340	13	13588	9.22262	1	0.743768	49.8961
GOTERM_BP_FAT	GO:0006886~intracellular protein transport	13	2.76596	0.044648	MFN2, SRP14, WDR19, AP1M1, VCP, IPO13, SNUPN, HGS, SNX1, VTI1B, STRADB, TIMM13, AIP	340	276	13588	1.8824	1	0.772128	53.5094
GOTERM_BP_FAT	GO:0051187~cofactor catabolic process	4	0.851064	0.0447927	SDHA, ACO2, CS, CSL	340	32	13588	4.99559	1	0.766548	53.6274
GOTERM_BP_FAT	GO:0070647~protein modification by small protein conjugation or removal	7	1.48936	0.0457629	MIB1, AURKAIP1, SKP2, FTSJD2, MUL1, UIMC1, RBX1	340	104	13588	2.68993	1	0.767402	54.4109
GOTERM_BP_FAT	GO:0032446~protein modification by small protein conjugation	6	1.2766	0.0473144	MIB1, AURKAIP1, SKP2, FTSJD2, MUL1, RBX1	340	79	13588	3.03529	1	0.772506	55.638
GOTERM_BP_FAT	GO:0051301~cell division	13	2.76596	0.0498768	MAEA, SYCE2, SYCE1, SYCP2, SYCP1, CDKN2A, SYCP3, FTSJD2, CDK11B, HAUS8, TOP2A, SEPT9, TERF1	340	281	13588	1.8489	1	0.78432	57.597
GOTERM_BP_FAT	GO:0010605~negative regulation of macromolecule metabolic process	20	4.25532	0.0503218	MDFI, EID1, SRP14, CTBP1, SKP2, ZFP639, SIRT7, ANKHD1, UIMC1, FLNA, CITED2, PAIP2B, MOV10, CDKN2A, DRAP1, NPM1, RARA, BHLHE41, HBA-X, NR2F1	340	506	13588	1.57963	1	0.781258	57.9288
GOTERM_BP_FAT	GO:0007143~female meiosis	3	0.638298	0.0526095	SYCP3, STAG3, SYCP2	340	15	13588	7.99294	1	0.790378	59.5964
GOTERM_BP_FAT	GO:0006405~RNA export from nucleus	3	0.638298	0.0526095	NUP133, DDX25, NPM1	340	15	13588	7.99294	1	0.790378	59.5964
GOTERM_BP_FAT	GO:0007283~spermatogenesis	12	2.55319	0.0554956	ZFP541, SHBG, MEI1, SYCP3, DDX25, TSNAX, D1PAS1, TXNRD3, MTL5, DMC1, SPATA5, TAF7L	340	255	13588	1.88069	1	0.802437	61.6115
GOTERM_BP_FAT	GO:0048232~male gamete generation	12	2.55319	0.0554956	ZFP541, SHBG, MEI1, SYCP3, DDX25, TSNAX, D1PAS1, TXNRD3, MTL5, DMC1, SPATA5, TAF7L	340	255	13588	1.88069	1	0.802437	61.6115
GOTERM_BP_FAT	GO:0048002~antigen processing and presentation of peptide antigen	4	0.851064	0.056	H2-K1, H2-L, H2-D1, H2-AB1, CALR	340	35	13588	4.56739	1	0.799842	61.9538
GOTERM_BP_FAT	GO:0042592~homeostatic process	22	4.68085	0.0590222	CHERP, MAEA, AIFM1, UGT8A, ACACA, PRDX5, USF1, ADORA1, APLP2, GPX1, HBA-A2, ALAS2, ANK1, PYGM, TXNDC16, NPM1, TXNRD3, EPOR, QSOX1, HBA-X, SCARA5, TERF1	340	584	13588	1.50552	1	0.811635	63.9456
GOTERM_BP_FAT	GO:0009057~macromolecule catabolic process	24	5.10638	0.0608638	MKRN1, HYAL2, AIFM1, SKP2, UBE2L6, MUL1, RBX1, FBXO38, URM1, MIB1, PSMB6, VCP, PYGM, PSMC4, ASB1, FTSJD2, USP20, HECTD3, MEX3D, RNF19B, FBXO47, RNF20, USP32, UBE2T	340	654	13588	1.46659	1	0.816293	65.1107
GOTERM_BP_FAT	GO:0045184~establishment of protein localization	24	5.10638	0.0628568	NUP133, SRP14, AP1M1, RAB8A, IPO13, SNUPN, ERP29, VTI1B, SNX1, NUP188, TIMM13, STRADB, LSR, FLNA, AIP, MFN2, WDR19, VCP, NUP210, RAB22A, HGS, TOMM22, VPS39, TNPO3	340	656	13588	1.46212	1	0.821473	66.3317
GOTERM_BP_FAT	GO:0006259~DNA metabolic process	17	3.61702	0.0629383	AIFM1, MSH5, PPFIBP1, ATR, XRCC1, ESCO2, UIMC1, RBX1, GTF2H1, CCDC111, KRT7, FTSJD2, DMC1, KCTD13, TOP2A, FEN1, TERF1	340	421	13588	1.61378	1	0.816859	66.3808
GOTERM_BP_FAT	GO:0006091~generation of precursor metabolites and energy	12	2.55319	0.0633797	ALDOA, SDHA, PYGM, ACO2, NDUFB9, CS, GYS1, TXNRD3, FDXR, FADS2, CSL, NDUFA10	340	261	13588	1.83746	1	0.814121	66.6454
GOTERM_BP_FAT	GO:0006352~transcription initiation	4	0.851064	0.0641392	TAF4B, TAF9B, TBP, TAF7L	340	37	13588	4.32051	1	0.813046	67.096
GOTERM_BP_FAT	GO:0042440~pigment metabolic process	4	0.851064	0.0641392	ALAD, ALAS2, UROS, PPOX	340	37	13588	4.32051	1	0.813046	67.096
GOTERM_BP_FAT	GO:0002474~antigen processing and presentation of peptide antigen via MHC class I	3	0.638298	0.0659694	H2-K1, H2-L, H2-D1, CALR	340	17	13588	7.0526	1	0.81729	68.1586
GOTERM_BP_FAT	GO:0009967~positive regulation of signal transduction	9	1.91489	0.0666525	GPX1, CDKN2A, GPC3, LITAF, ALDH1A3, SKP2, MUL1, FLNA, CITED2	340	172	13588	2.09118	1	0.815857	68.5468
GOTERM_BP_FAT	GO:0048610~reproductive cellular process	9	1.91489	0.0684494	SHBG, MEI1, WNT4, DDX25, TNC, HSD17B4, DMC1, SPA17, TAF7L	340	173	13588	2.07909	1	0.81974	69.547
GOTERM_BP_FAT	GO:0045454~cell redox homeostasis	5	1.06383	0.0687936	AIFM1, TXNDC16, TXNRD3, PRDX5, QSOX1	340	62	13588	3.22296	1	0.81676	69.7352
GOTERM_BP_FAT	GO:0006916~anti-apoptosis	6	1.2766	0.0689139	TSC22D3, CLU, SKP2, STRADB, SNAI2, CITED2	340	88	13588	2.72487	1	0.812766	69.8007
GOTERM_BP_FAT	GO:0043516~regulation of DNA damage response, signal transduction by p53 class mediator	2	0.425532	0.0729989	CDKN2A, NPM1	340	3	13588	26.6431	1	0.826774	71.9472
GOTERM_BP_FAT	GO:0043122~regulation of I-kappaB kinase/NF-kappaB cascade	4	0.851064	0.0773004	LITAF, SQSTM1, MUL1, FLNA	340	40	13588	3.99647	1	0.84031	74.0519
GOTERM_BP_FAT	GO:0051236~establishment of RNA localization	5	1.06383	0.0824228	NUP133, NUP210, DDX25, NPM1, NUP188	340	66	13588	3.02763	1	0.855464	76.3646
GOTERM_BP_FAT	GO:0050658~RNA transport	5	1.06383	0.0824228	NUP133, NUP210, DDX25, NPM1, NUP188	340	66	13588	3.02763	1	0.855464	76.3646
GOTERM_BP_FAT	GO:0050657~nucleic acid transport	5	1.06383	0.0824228	NUP133, NUP210, DDX25, NPM1, NUP188	340	66	13588	3.02763	1	0.855464	76.3646
GOTERM_BP_FAT	GO:0006351~transcription, DNA-dependent	7	1.48936	0.0849005	CDKN2A, TAF4B, TAF9B, TBP, SIRT7, TAF7L, GTF2H1	340	122	13588	2.29306	1	0.860221	77.4124
GOTERM_BP_FAT	GO:0006508~proteolysis	34	7.23404	0.0857096	MKRN1, CNDP2, CTSA, MMP23, C1QC, RBX1, PEG10, PSMB6, HTRA1, HECTD3, PRSS16, FBXO47, PCSK5, USP32, PLAT, PEPD, SKP2, UBE2L6, MUL1, XPNPEP1, MMP11, DNPEP, FBXO38, URM1, MIB1, VCP, CPXM1, ASB1, USP20, FTSJD2, RNF19B, RNF20, ADAMDEC1, UBE2T	340	1034	13588	1.31412	1	0.859206	77.7449
GOTERM_BP_FAT	GO:0000278~mitotic cell cycle	11	2.34043	0.0858407	SPDYA, SYCP3, ANP32B, SKP2, FTSJD2, HORMAD1, HAUS8, HORMAD2, SIRT7, TERF1, RBBP8	340	244	13588	1.80169	1	0.855924	77.7984
GOTERM_BP_FAT	GO:0006403~RNA localization	5	1.06383	0.0860232	NUP133, NUP210, DDX25, NPM1, NUP188	340	67	13588	2.98244	1	0.852831	77.8726
GOTERM_BP_FAT	GO:0048609~reproductive process in a multicellular organism	16	3.40426	0.0870818	ZFP541, SHBG, MSH5, TSNAX, FIGLA, MTL5, TAF7L, CITED2, MEI1, WNT4, SYCP3, DDX25, D1PAS1, TXNRD3, DMC1, SPATA5	340	409	13588	1.56341	1	0.852755	78.2984
GOTERM_BP_FAT	GO:0032504~multicellular organism reproduction	16	3.40426	0.0870818	ZFP541, SHBG, MSH5, TSNAX, FIGLA, MTL5, TAF7L, CITED2, MEI1, WNT4, SYCP3, DDX25, D1PAS1, TXNRD3, DMC1, SPATA5	340	409	13588	1.56341	1	0.852755	78.2984
GOTERM_BP_FAT	GO:0019725~cellular homeostasis	14	2.97872	0.0882275	CHERP, UGT8A, AIFM1, PRDX5, ADORA1, APLP2, ALAS2, PYGM, TXNDC16, NPM1, TXNRD3, EPOR, SCARA5, QSOX1	340	343	13588	1.63121	1	0.852976	78.7507
GOTERM_BP_FAT	GO:0051726~regulation of cell cycle	10	2.12766	0.0883846	SPDYA, CDKN2A, NPM1, SKP2, HECTD3, CDK11B, ATR, CALR, UIMC1, CITED2	340	214	13588	1.86751	1	0.849896	78.812
GOTERM_BP_FAT	GO:0006631~fatty acid metabolic process	9	1.91489	0.0904611	ACADVL, TNFRSF1A, ACACA, FADS2, HSD17B4, ACADL, HADH, PHYH, SLC27A4	340	184	13588	1.9548	1	0.853227	79.6069
GOTERM_BP_FAT	GO:0015031~protein transport	23	4.89362	0.0919381	NUP133, SRP14, AP1M1, RAB8A, IPO13, SNUPN, ERP29, VTI1B, SNX1, NUP188, TIMM13, STRADB, LSR, AIP, MFN2, WDR19, VCP, NUP210, RAB22A, HGS, TOMM22, VPS39, TNPO3	340	651	13588	1.41196	1	0.854512	80.1552
GOTERM_BP_FAT	GO:0030099~myeloid cell differentiation	6	1.2766	0.0919859	HBA-A2, ANK1, ALAS2, MAEA, RELB, HBA-X	340	96	13588	2.49779	1	0.851206	80.1727
GOTERM_BP_FAT	GO:0006913~nucleocytoplasmic transport	6	1.2766	0.0919859	NUP133, IPO13, SNUPN, DDX25, NPM1, STRADB	340	96	13588	2.49779	1	0.851206	80.1727
GOTERM_BP_FAT	GO:0032268~regulation of cellular protein metabolic process	12	2.55319	0.0929029	MDFI, SRP14, CDKN2A, AURKAIP1, KRT7, DDX25, MUL1, ANKHD1, PPP1R15A, ADORA1, EIF4E2, PAIP2B	340	280	13588	1.71277	1	0.850723	80.5058
GOTERM_BP_FAT	GO:0033365~protein localization in organelle	6	1.2766	0.0951186	MFN2, SRP14, IPO13, SNUPN, TIMM13, AIP	340	97	13588	2.47204	1	0.854335	81.2891
GOTERM_BP_FAT	GO:0007066~female meiosis sister chromatid cohesion	2	0.425532	0.0961313	SYCP3, STAG3	340	4	13588	19.9824	1	0.85414	81.6371
GOTERM_BP_FAT	GO:0015980~energy derivation by oxidation of organic compounds	6	1.2766	0.0983051	SDHA, PYGM, ACO2, CS, GYS1, CSL	340	98	13588	2.44682	1	0.857449	82.3638
GOTERM_BP_FAT	GO:0051169~nuclear transport	6	1.2766	0.0983051	NUP133, IPO13, SNUPN, DDX25, NPM1, STRADB	340	98	13588	2.44682	1	0.857449	82.3638

## Sheet: DAVID_GOenrichments_Up4.txt
Category	Term	Count	%	PValue	Genes	List Total	Pop Hits	Pop Total	Fold Enrichment	Bonferroni	Benjamini	FDR
GOTERM_BP_FAT	GO:0051301~cell division	32	7.23982	4.77749e-13	BMI1, SEPT5, PRC1, NEK2, CCNG1, LLGL2, CDCA8, CDC45, RAD21, INCENP, CLASP2, CDCA5, CCNA2, STAG1, ROCK2, PAPD5, RB1, UBE2C, CDC27, WEE1, CDC25A, NCAPD2, CCNB1, CCND1, CCNB2, PLK1, TIAL1, CNTROB, MAPRE1, CHFR, SPAST, NEK6	316	281	13588	4.8968	8.12139e-10	8.12139e-10	8.05778e-10
GOTERM_BP_FAT	GO:0000278~mitotic cell cycle	27	6.1086	8.69588e-11	E2F5, NEK2, CCNG1, CDCA8, RAD21, INCENP, CAMK2D, CLASP2, CDCA5, CCNA2, STAG1, MAP2K1, PAPD5, RB1, UBE2C, CDC27, WEE1, CDC25A, NCAPD2, CCNB1, CCND1, CCNB2, PLK1, ID4, MAPRE1, CHFR, NEK6	316	244	13588	4.7582	1.4783e-07	7.3915e-08	1.46672e-07
GOTERM_BP_FAT	GO:0022403~cell cycle phase	31	7.01357	1.34575e-10	E2F5, NEK2, RBM7, CCNG1, CDCA8, RAD21, STRA8, INCENP, CAMK2D, CLASP2, CDCA5, CCNA2, STAG1, MAP2K1, PAPD5, RB1, UBE2C, CDC27, WEE1, CDC25A, NCAPD2, SUV39H2, CCNB1, CCND1, REC8, CCNB2, PLK1, ID4, MAPRE1, CHFR, NEK6	316	328	13588	4.06402	2.28778e-07	7.62592e-08	2.26986e-07
GOTERM_BP_FAT	GO:0007049~cell cycle	42	9.50226	7.97032e-10	SEPT5, PRC1, E2F5, NEK2, RBM7, CCNG1, LLGL2, CDCA8, CDC45, RAD21, STRA8, INCENP, CAMK2D, CLASP2, CCNA2, CDCA5, STAG1, TAF1, MAP2K1, CCNH, GMNN, RBL1, PAPD5, RB1, UBE2C, CDC27, CDC25A, WEE1, SUV39H2, NCAPD2, CCNB1, CCND1, REC8, CCNB2, PLK1, CNTROB, ID4, MAPRE1, CHFR, NEK6, SPAST, DSCC1	316	611	13588	2.95581	1.35495e-06	3.38738e-07	1.34434e-06
GOTERM_BP_FAT	GO:0022402~cell cycle process	32	7.23982	2.54195e-09	E2F5, NEK2, RBM7, CCNG1, CDCA8, RAD21, STRA8, INCENP, CAMK2D, CLASP2, CDCA5, CCNA2, STAG1, MAP2K1, PAPD5, RB1, UBE2C, CDC27, WEE1, CDC25A, NCAPD2, SUV39H2, CCNB1, CCND1, REC8, CCNB2, PLK1, CNTROB, ID4, MAPRE1, CHFR, NEK6	316	393	13588	3.50127	4.32131e-06	8.64264e-07	4.28747e-06
GOTERM_BP_FAT	GO:0000280~nuclear division	22	4.97738	3.07451e-09	MAP2K1, NEK2, PAPD5, CCNG1, UBE2C, CDC27, CDC25A, WEE1, NCAPD2, CCNB1, CDCA8, RAD21, CCNB2, PLK1, INCENP, MAPRE1, CLASP2, CHFR, CCNA2, CDCA5, NEK6, STAG1	316	190	13588	4.97895	5.22666e-06	8.71112e-07	5.18574e-06
GOTERM_BP_FAT	GO:0007067~mitosis	22	4.97738	3.07451e-09	MAP2K1, NEK2, PAPD5, CCNG1, UBE2C, CDC27, CDC25A, WEE1, NCAPD2, CCNB1, CDCA8, RAD21, CCNB2, PLK1, INCENP, MAPRE1, CLASP2, CHFR, CCNA2, CDCA5, NEK6, STAG1	316	190	13588	4.97895	5.22666e-06	8.71112e-07	5.18574e-06
GOTERM_BP_FAT	GO:0000087~M phase of mitotic cell cycle	22	4.97738	4.48684e-09	MAP2K1, NEK2, PAPD5, CCNG1, UBE2C, CDC27, CDC25A, WEE1, NCAPD2, CCNB1, CDCA8, RAD21, CCNB2, PLK1, INCENP, MAPRE1, CLASP2, CHFR, CCNA2, CDCA5, NEK6, STAG1	316	194	13588	4.87629	7.6276e-06	1.08966e-06	7.56788e-06
GOTERM_BP_FAT	GO:0048285~organelle fission	22	4.97738	5.91945e-09	MAP2K1, NEK2, PAPD5, CCNG1, UBE2C, CDC27, CDC25A, WEE1, NCAPD2, CCNB1, CDCA8, RAD21, CCNB2, PLK1, INCENP, MAPRE1, CLASP2, CHFR, CCNA2, CDCA5, NEK6, STAG1	316	197	13588	4.80203	1.0063e-05	1.25788e-06	9.98425e-06
GOTERM_BP_FAT	GO:0000279~M phase	26	5.88235	1.00781e-08	NEK2, RBM7, CCNG1, CDCA8, RAD21, STRA8, INCENP, CLASP2, CDCA5, CCNA2, STAG1, MAP2K1, PAPD5, UBE2C, CDC27, WEE1, CDC25A, NCAPD2, SUV39H2, CCNB1, REC8, CCNB2, PLK1, MAPRE1, CHFR, NEK6	316	283	13588	3.95053	1.71325e-05	1.90363e-06	1.69985e-05
GOTERM_BP_FAT	GO:0044265~cellular macromolecule catabolic process	33	7.46606	1.3392e-05	RAD23B, XIAP, RLIM, LIN28A, FBXL19, SUMO3, ZFP36L3, CUL5, STRA8, PPP2CB, FBXO25, ZMPSTE24, VCPIP1, TBL1XR1, ZCCHC11, UFD1L, UBR3, HERC3, TOPORS, UBE2Q2, UBE2C, MARCH6, TRIM33, ATG4C, RNF5, UBE2K, PSMA4, UCHL5, RNF139, UBE2W, ASB3, FBXO33, CHFR	316	609	13588	2.33005	0.0225094	0.00227407	0.0225857
GOTERM_BP_FAT	GO:0019941~modification-dependent protein catabolic process	29	6.56109	2.021e-05	RAD23B, XIAP, RLIM, FBXL19, SUMO3, CUL5, PPP2CB, FBXO25, ZMPSTE24, VCPIP1, TBL1XR1, UFD1L, UBR3, HERC3, TOPORS, UBE2Q2, UBE2C, MARCH6, TRIM33, ATG4C, UBE2K, RNF5, PSMA4, UCHL5, RNF139, UBE2W, ASB3, FBXO33, CHFR	316	508	13588	2.45472	0.0337738	0.00311852	0.0340824
GOTERM_BP_FAT	GO:0043632~modification-dependent macromolecule catabolic process	29	6.56109	2.021e-05	RAD23B, XIAP, RLIM, FBXL19, SUMO3, CUL5, PPP2CB, FBXO25, ZMPSTE24, VCPIP1, TBL1XR1, UFD1L, UBR3, HERC3, TOPORS, UBE2Q2, UBE2C, MARCH6, TRIM33, ATG4C, UBE2K, RNF5, PSMA4, UCHL5, RNF139, UBE2W, ASB3, FBXO33, CHFR	316	508	13588	2.45472	0.0337738	0.00311852	0.0340824
GOTERM_BP_FAT	GO:0051603~proteolysis involved in cellular protein catabolic process	29	6.56109	4.93147e-05	RAD23B, XIAP, RLIM, FBXL19, SUMO3, CUL5, PPP2CB, FBXO25, ZMPSTE24, VCPIP1, TBL1XR1, UFD1L, UBR3, HERC3, TOPORS, UBE2Q2, UBE2C, MARCH6, TRIM33, ATG4C, UBE2K, RNF5, PSMA4, UCHL5, RNF139, UBE2W, ASB3, FBXO33, CHFR	316	534	13588	2.33521	0.0804188	0.00696207	0.0831457
GOTERM_BP_FAT	GO:0009057~macromolecule catabolic process	33	7.46606	5.40341e-05	RAD23B, XIAP, RLIM, LIN28A, FBXL19, SUMO3, ZFP36L3, CUL5, STRA8, PPP2CB, FBXO25, ZMPSTE24, VCPIP1, TBL1XR1, ZCCHC11, UFD1L, UBR3, HERC3, TOPORS, UBE2Q2, UBE2C, MARCH6, TRIM33, ATG4C, RNF5, UBE2K, PSMA4, UCHL5, RNF139, UBE2W, ASB3, FBXO33, CHFR	316	654	13588	2.16972	0.0877676	0.00704129	0.0910995
GOTERM_BP_FAT	GO:0044257~cellular protein catabolic process	29	6.56109	5.43278e-05	RAD23B, XIAP, RLIM, FBXL19, SUMO3, CUL5, PPP2CB, FBXO25, ZMPSTE24, VCPIP1, TBL1XR1, UFD1L, UBR3, HERC3, TOPORS, UBE2Q2, UBE2C, MARCH6, TRIM33, ATG4C, UBE2K, RNF5, PSMA4, UCHL5, RNF139, UBE2W, ASB3, FBXO33, CHFR	316	537	13588	2.32216	0.088223	0.00657542	0.0915944
GOTERM_BP_FAT	GO:0030163~protein catabolic process	29	6.56109	9.89933e-05	RAD23B, XIAP, RLIM, FBXL19, SUMO3, CUL5, PPP2CB, FBXO25, ZMPSTE24, VCPIP1, TBL1XR1, UFD1L, UBR3, HERC3, TOPORS, UBE2Q2, UBE2C, MARCH6, TRIM33, ATG4C, UBE2K, RNF5, PSMA4, UCHL5, RNF139, UBE2W, ASB3, FBXO33, CHFR	316	556	13588	2.24281	0.154897	0.0111571	0.166839
GOTERM_BP_FAT	GO:0051726~regulation of cell cycle	16	3.61991	0.000140816	E2F5, ROCK2, GMNN, HUS1, RB1, INTS3, NRAS, CCND1, PLK4, XPC, KRAS, STRA8, DAZL, CHFR, NEK6, DLG1	316	214	13588	3.21495	0.212904	0.0148514	0.237248
GOTERM_BP_FAT	GO:0016310~phosphorylation	33	7.46606	0.000299382	PRPF4B, NEK2, NDUFB8, HUS1, KIT, PAK2, CAMK2D, STK39, YES1, IPMK, AKT3, CDK13, MAP2K1, RYK, TRPM7, ROCK2, CREB1, TGFBR1, NDUFC2, PKN2, NPR2, STK4, WEE1, TYK2, CCNB1, RPS6KA6, CCND1, PLK4, FYN, PLK1, MAPK8, ABL2, NEK6	316	718	13588	1.97632	0.398919	0.0294989	0.503766
GOTERM_BP_FAT	GO:0000082~G1/S transition of mitotic cell cycle	6	1.35747	0.000411133	CCND1, E2F5, CAMK2D, ID4, RB1, CDCA5	316	28	13588	9.21429	0.502953	0.0380928	0.691195
GOTERM_BP_FAT	GO:0006468~protein amino acid phosphorylation	30	6.78733	0.000444563	PRPF4B, NEK2, HUS1, KIT, PAK2, CAMK2D, STK39, YES1, AKT3, CDK13, MAP2K1, RYK, TRPM7, ROCK2, CREB1, TGFBR1, PKN2, NPR2, STK4, WEE1, TYK2, CCNB1, RPS6KA6, CCND1, PLK4, FYN, PLK1, MAPK8, ABL2, NEK6	316	640	13588	2.01562	0.530424	0.0390045	0.747199
GOTERM_BP_FAT	GO:0009725~response to hormone stimulus	13	2.94118	0.000466059	PHIP, HMGB2, GCLC, MAP2K1, MAT2A, GATM, SNRPN, TGFBR1, ADIPOR1, PDE3B, SORT1, STXBP3A, AKT3	316	165	13588	3.38788	0.547281	0.0388495	0.783194
GOTERM_BP_FAT	GO:0051276~chromosome organization	22	4.97738	0.00049176	HMGN1, BMI1, TAF1, TBL1XR1, SATB1, NEK2, SETD1B, CEBPG, RBL1, POT1A, RB1, SIRT1, SUV39H2, NCAPD2, SUZ12, REC8, CDYL, STRA8, CENPA, EED, PBRM1, CDCA5	316	404	13588	2.34158	0.566645	0.0390366	0.826216
GOTERM_BP_FAT	GO:0007059~chromosome segregation	8	1.80995	0.000673904	REC8, RAD21, STRA8, NEK2, INCENP, CDCA5, NEK6, STAG1	316	64	13588	5.375	0.682101	0.0507584	1.13061
GOTERM_BP_FAT	GO:0046777~protein amino acid autophosphorylation	8	1.80995	0.000812198	PAK2, FYN, TRPM7, TGFBR1, CAMK2D, KIT, YES1, STK4	316	66	13588	5.21212	0.748748	0.0582886	1.36113
GOTERM_BP_FAT	GO:0009719~response to endogenous stimulus	13	2.94118	0.00120912	PHIP, HMGB2, GCLC, MAP2K1, MAT2A, GATM, SNRPN, TGFBR1, ADIPOR1, PDE3B, SORT1, STXBP3A, AKT3	316	184	13588	3.03804	0.872131	0.0821285	2.01996
GOTERM_BP_FAT	GO:0001701~in utero embryonic development	16	3.61991	0.00142839	BMI1, MAP2K1, COPS3, TGFBR1, UBR3, MBNL1, CCNB1, GATA2, PLK4, SALL4, HIF1A, NDEL1, CCNB2, RRN3, SP3, COL4A3BP	316	267	13588	2.57678	0.911963	0.0926253	2.38213
GOTERM_BP_FAT	GO:0045449~regulation of transcription	73	16.5158	0.00161998	NKAP, BMI1, TCEANC, ZBTB33, E2F5, CNOT2, RLIM, ZFP871, CNOT6, SOHLH2, PNN, NFATC2IP, GATA2, PCGF3, GTF2A1, ASH2L, CGGBP1, MIER1, EED, SERTAD3, CCNA2, SERTAD2, TBL1XR1, SATB1, ZCCHC11, POGZ, CCNH, RBL1, RB1, TOPORS, MBD2, ZFP26, TTF2, SUZ12, TAF13, HIF1A, TCFL5, TRIM33, LIN54, ABLIM1, HMGB2, GCLC, NACA, SETD1B, NFYB, LIN28A, ATF2, MSX2, CDYL, ZFP191, LHX2, PBRM1, NFATC3, SLC30A9, MLLT3, TAF1, ERF,…	316	2227	13588	1.40952	0.936467	0.100582	2.69756
GOTERM_BP_FAT	GO:0006793~phosphorus metabolic process	35	7.91855	0.00179696	PRPF4B, NEK2, NDUFB8, HUS1, KIT, MTMR1, PAK2, CAMK2D, STK39, YES1, IPMK, AKT3, CDK13, MAP2K1, RYK, TRPM7, ROCK2, CREB1, TGFBR1, NDUFC2, PKN2, NPR2, STK4, CDC25A, WEE1, CCNB1, TYK2, RPS6KA6, CCND1, PLK4, FYN, PLK1, MAPK8, ABL2, NEK6	316	866	13588	1.73788	0.952999	0.107067	2.98808
GOTERM_BP_FAT	GO:0006796~phosphate metabolic process	35	7.91855	0.00179696	PRPF4B, NEK2, NDUFB8, HUS1, KIT, MTMR1, PAK2, CAMK2D, STK39, YES1, IPMK, AKT3, CDK13, MAP2K1, RYK, TRPM7, ROCK2, CREB1, TGFBR1, NDUFC2, PKN2, NPR2, STK4, CDC25A, WEE1, CCNB1, TYK2, RPS6KA6, CCND1, PLK4, FYN, PLK1, MAPK8, ABL2, NEK6	316	866	13588	1.73788	0.952999	0.107067	2.98808
GOTERM_BP_FAT	GO:0009314~response to radiation	11	2.48869	0.0018324	HMGN1, NRAS, THBD, KRAS, XPC, MAT2A, NF1, HUS1, MAPK8, INTS3, KIT	316	143	13588	3.30769	0.955752	0.105379	3.04616
GOTERM_BP_FAT	GO:0043009~chordate embryonic development	21	4.75113	0.00196934	BMI1, MAP2K1, COPS3, TGFBR1, NF1, UBR3, FZD3, MBNL1, CCNB1, GATA2, PLK4, SALL4, HIF1A, NDEL1, CCNB2, TSC1, RRN3, SP3, COL4A3BP, IPMK, DLG1	316	421	13588	2.14489	0.964957	0.109131	3.27025
GOTERM_BP_FAT	GO:0009792~embryonic development ending in birth or egg hatching	21	4.75113	0.00219106	BMI1, MAP2K1, COPS3, TGFBR1, NF1, UBR3, FZD3, MBNL1, CCNB1, GATA2, PLK4, SALL4, HIF1A, NDEL1, CCNB2, TSC1, RRN3, SP3, COL4A3BP, IPMK, DLG1	316	425	13588	2.12471	0.97598	0.116882	3.63208
GOTERM_BP_FAT	GO:0044272~sulfur compound biosynthetic process	6	1.35747	0.0024518	MTHFD1, GCLC, MAT2A, LIPT2, GCLM, HS2ST1	316	41	13588	6.29268	0.984597	0.125951	4.05595
GOTERM_BP_FAT	GO:0006665~sphingolipid metabolic process	7	1.58371	0.00305792	SAMD8, SGPL1, SGPP1, COL4A3BP, UGCG, KIT, B4GALT6	316	62	13588	4.85484	0.994519	0.150155	5.0345
GOTERM_BP_FAT	GO:0000910~cytokinesis	5	1.13122	0.00326329	PRC1, ROCK2, INCENP, CNTROB, SPAST	316	27	13588	7.96296	0.996138	0.15497	5.36392
GOTERM_BP_FAT	GO:0006643~membrane lipid metabolic process	7	1.58371	0.00358863	SAMD8, SGPL1, SGPP1, COL4A3BP, UGCG, KIT, B4GALT6	316	64	13588	4.70312	0.997783	0.164524	5.88359
GOTERM_BP_FAT	GO:0008283~cell proliferation	14	3.16742	0.00506066	SATB1, MAP2K1, FKBP1A, KIT, HDGFRP3, NRAS, CCND1, NDEL1, RRN3, FYN, COL4A3BP, ID4, RAP1B, DLG1	316	247	13588	2.43725	0.99982	0.218412	8.20149
GOTERM_BP_FAT	GO:0048710~regulation of astrocyte differentiation	3	0.678733	0.00511486	BMP2, NF1, ID4	316	5	13588	25.8	0.999836	0.215065	8.28579
GOTERM_BP_FAT	GO:0051329~interphase of mitotic cell cycle	6	1.35747	0.005368	CCND1, E2F5, CAMK2D, ID4, RB1, CDCA5	316	49	13588	5.26531	0.999894	0.219095	8.67861
GOTERM_BP_FAT	GO:0009628~response to abiotic stimulus	14	3.16742	0.00577561	HMGN1, GCLC, MAT2A, SLC12A2, NF1, HUS1, INTS3, KIT, NRAS, XPC, THBD, KRAS, FYN, MAPK8	316	251	13588	2.39841	0.999947	0.228279	9.30779
GOTERM_BP_FAT	GO:0007507~heart development	13	2.94118	0.00585322	MSX2, BMP2, SALL4, CRKL, HIF1A, TSC1, COL4A3BP, TGFBR1, NF1, PPP3R1, PBRM1, FKBP1A, NFATC3	316	223	13588	2.50673	0.999954	0.225773	9.42712
GOTERM_BP_FAT	GO:0042692~muscle cell differentiation	9	2.0362	0.00585997	NRAS, KRAS, TSC1, MTPN, SORT1, RB1, MBNL1, HOMER1, QK	316	117	13588	3.30769	0.999954	0.221029	9.4375
GOTERM_BP_FAT	GO:0006350~transcription	58	13.1222	0.00599797	BMI1, TCEANC, ZBTB33, E2F5, CNOT2, RLIM, ZFP871, CNOT6, SOHLH2, PNN, GATA2, PCGF3, RRN3, ASH2L, GTF2A1, MIER1, CGGBP1, EED, SERTAD3, SERTAD2, TBL1XR1, CCNH, RBL1, RB1, MBD2, ZFP26, TTF2, SUZ12, TAF13, HIF1A, TRIM33, LIN54, NACA, SETD1B, NFYB, ATF2, CDYL, ZFP191, LHX2, PBRM1, NFATC3, SLC30A9, MLLT3, TAF1, POLR3F, ERF, CEBPG, CREB1, ARID3B, ZFP148, 2700050L05RIK, SIRT1, ZBTB43, SUV39H2, SALL4, PHF1…	316	1772	13588	1.40745	0.999964	0.220767	9.6493
GOTERM_BP_FAT	GO:0051325~interphase	6	1.35747	0.00636959	CCND1, E2F5, CAMK2D, ID4, RB1, CDCA5	316	51	13588	5.05882	0.999981	0.2279	10.2173
GOTERM_BP_FAT	GO:0006325~chromatin organization	16	3.61991	0.00667338	HMGN1, BMI1, TAF1, TBL1XR1, SATB1, CEBPG, SETD1B, RBL1, RB1, SIRT1, SUV39H2, SUZ12, CDYL, CENPA, EED, PBRM1	316	315	13588	2.18413	0.999989	0.232576	10.6792
GOTERM_BP_FAT	GO:0001501~skeletal system development	15	3.39367	0.00672141	BMI1, SGPL1, BMP2, RYK, TGFBR1, NF1, NPR2, PEX7, HIF1A, SP3, INSIG1, SORT1, MAPK8, PLEKHA1, DLG1	316	285	13588	2.26316	0.99999	0.229386	10.752
GOTERM_BP_FAT	GO:0000075~cell cycle checkpoint	6	1.35747	0.00691654	CCND1, XPC, STRA8, HUS1, INTS3, CHFR	316	52	13588	4.96154	0.999992	0.230642	11.0473
GOTERM_BP_FAT	GO:0048609~reproductive process in a multicellular organism	19	4.29864	0.0070329	RAD23B, HMGB2, RHOX5, AGFG1, CREB1, TGFBR1, ZFP148, KIT, MBD2, SIRT1, SOHLH2, QK, CCND1, REC8, STRA8, TCFL5, TIAL1, SP3, DAZL	316	409	13588	1.99756	0.999994	0.229588	11.2229
GOTERM_BP_FAT	GO:0032504~multicellular organism reproduction	19	4.29864	0.0070329	RAD23B, HMGB2, RHOX5, AGFG1, CREB1, TGFBR1, ZFP148, KIT, MBD2, SIRT1, SOHLH2, QK, CCND1, REC8, STRA8, TCFL5, TIAL1, SP3, DAZL	316	409	13588	1.99756	0.999994	0.229588	11.2229
GOTERM_BP_FAT	GO:0010033~response to organic substance	22	4.97738	0.00720887	NKAP, HMGB2, ZCCHC11, GCLC, MAP2K1, GATM, MAT2A, SNRPN, CREB1, TGFBR1, ADIPOR1, PDE3B, FKBP1A, LIN28A, MSX2, PHIP, CCND1, THBD, FYN, SORT1, STXBP3A, AKT3	316	505	13588	1.87327	0.999995	0.230251	11.4879
GOTERM_BP_FAT	GO:0009416~response to light stimulus	8	1.80995	0.00771024	HMGN1, NRAS, KRAS, XPC, MAT2A, NF1, HUS1, MAPK8	316	98	13588	3.5102	0.999998	0.239766	12.2389
GOTERM_BP_FAT	GO:0006275~regulation of DNA replication	4	0.904977	0.00777714	STRA8, GMNN, HUS1, PCNA	316	18	13588	9.55556	0.999998	0.237287	12.3386
GOTERM_BP_FAT	GO:0006873~cellular ion homeostasis	14	3.16742	0.00791979	KCNMB4, GCLC, CLSTN1, NF1, IREB2, FKBP1A, ABCB7, GCLM, QK, HIF1A, TSC1, FYN, ATP2C1, DLG1	316	261	13588	2.30651	0.999999	0.236884	12.5509
GOTERM_BP_FAT	GO:0060021~palate development	5	1.13122	0.00842283	SGPL1, TGFBR1, INSIG1, DLG1, PLEKHA1	316	35	13588	6.14286	0.999999	0.245689	13.2958
GOTERM_BP_FAT	GO:0016568~chromatin modification	13	2.94118	0.00901619	BMI1, TAF1, SATB1, TBL1XR1, CEBPG, SETD1B, RBL1, RB1, SIRT1, SUV39H2, SUZ12, EED, PBRM1	316	236	13588	2.36864	1	0.256285	14.1668
GOTERM_BP_FAT	GO:0042592~homeostatic process	24	5.42986	0.00926923	KCNMB4, GCLC, SLC12A2, CEBPG, NF1, CLSTN1, IREB2, PRDX4, POT1A, PDE3B, FKBP1A, RB1, ABCB7, GCLM, QK, HIF1A, CCNB2, TSC1, RRN3, ATP2C1, FYN, SP3, COL4A3BP, DLG1	316	584	13588	1.76712	1	0.258219	14.5357
GOTERM_BP_FAT	GO:0055082~cellular chemical homeostasis	14	3.16742	0.00974405	KCNMB4, GCLC, CLSTN1, NF1, IREB2, FKBP1A, ABCB7, GCLM, QK, HIF1A, TSC1, FYN, ATP2C1, DLG1	316	268	13588	2.24627	1	0.265277	15.224
GOTERM_BP_FAT	GO:0032446~protein modification by small protein conjugation	7	1.58371	0.00998034	BMI1, SUZ12, SUMO3, TRIM33, UBE2C, CHFR, VCPIP1	316	79	13588	3.81013	1	0.266577	15.5645
GOTERM_BP_FAT	GO:0043353~enucleate erythrocyte differentiation	3	0.678733	0.0104159	SP3, CEBPG, RB1	316	7	13588	18.4286	1	0.272293	16.189
GOTERM_BP_FAT	GO:0019725~cellular homeostasis	16	3.61991	0.0140455	KCNMB4, GCLC, SLC12A2, NF1, CLSTN1, PRDX4, IREB2, FKBP1A, ABCB7, GCLM, QK, HIF1A, TSC1, ATP2C1, FYN, DLG1	316	343	13588	2.00583	1	0.344181	21.2256
GOTERM_BP_FAT	GO:0000096~sulfur amino acid metabolic process	4	0.904977	0.0155011	MTHFD1, GCLC, MAT2A, GCLM	316	23	13588	7.47826	1	0.36739	23.1644
GOTERM_BP_FAT	GO:0001890~placenta development	7	1.58371	0.0155677	DLX3, GATA2, PLK4, HIF1A, MAP2K1, SP3, PBRM1	316	87	13588	3.45977	1	0.363703	23.2521
GOTERM_BP_FAT	GO:0006511~ubiquitin-dependent protein catabolic process	9	2.0362	0.0169648	RAD23B, TBL1XR1, CUL5, UFD1L, PSMA4, PPP2CB, UCHL5, UBR3, CHFR	316	141	13588	2.74468	1	0.384176	25.0687
GOTERM_BP_FAT	GO:0006479~protein amino acid methylation	5	1.13122	0.0171915	PRMT3, SUZ12, SATB1, EED, SUV39H2	316	43	13588	5	1	0.383239	25.3596
GOTERM_BP_FAT	GO:0008213~protein amino acid alkylation	5	1.13122	0.0171915	PRMT3, SUZ12, SATB1, EED, SUV39H2	316	43	13588	5	1	0.383239	25.3596
GOTERM_BP_FAT	GO:0051146~striated muscle cell differentiation	7	1.58371	0.0172464	NRAS, KRAS, TSC1, MTPN, SORT1, RB1, HOMER1	316	89	13588	3.38202	1	0.379363	25.4298
GOTERM_BP_FAT	GO:0016567~protein ubiquitination	6	1.35747	0.0183244	BMI1, SUZ12, TRIM33, UBE2C, CHFR, VCPIP1	316	66	13588	3.90909	1	0.392896	26.7976
GOTERM_BP_FAT	GO:0050801~ion homeostasis	14	3.16742	0.0190733	KCNMB4, GCLC, CLSTN1, NF1, IREB2, FKBP1A, ABCB7, GCLM, QK, HIF1A, TSC1, FYN, ATP2C1, DLG1	316	293	13588	2.05461	1	0.400421	27.7338
GOTERM_BP_FAT	GO:0016571~histone methylation	4	0.904977	0.0194599	SUZ12, SATB1, EED, SUV39H2	316	25	13588	6.88	1	0.401883	28.2127
GOTERM_BP_FAT	GO:0060348~bone development	8	1.80995	0.0199413	BMP2, SP3, NF1, INSIG1, SORT1, MAPK8, NPR2, PEX7	316	118	13588	2.91525	1	0.404783	28.8048
GOTERM_BP_FAT	GO:0016570~histone modification	7	1.58371	0.0199913	BMI1, SUZ12, TAF1, SATB1, EED, SIRT1, SUV39H2	316	92	13588	3.27174	1	0.400933	28.8661
GOTERM_BP_FAT	GO:0019228~regulation of action potential in neuron	5	1.13122	0.0200253	KCNMB4, TSC1, FYN, NF1, QK	316	45	13588	4.77778	1	0.396925	28.9077
GOTERM_BP_FAT	GO:0042391~regulation of membrane potential	8	1.80995	0.0207827	KCNMB4, GCLC, TSC1, FYN, NF1, GCLM, QK, DLG1	316	119	13588	2.89076	1	0.403951	29.8288
GOTERM_BP_FAT	GO:0035020~regulation of Rac protein signal transduction	3	0.678733	0.0213186	NRAS, KRAS, NF1	316	10	13588	12.9	1	0.40746	30.4738
GOTERM_BP_FAT	GO:0032320~positive regulation of Ras GTPase activity	3	0.678733	0.0213186	NDEL1, RALBP1, NF1	316	10	13588	12.9	1	0.40746	30.4738
GOTERM_BP_FAT	GO:0006997~nucleus organization	5	1.13122	0.0215437	HMGB2, NDEL1, RRN3, AGFG1, ZMPSTE24	316	46	13588	4.67391	1	0.406355	30.743
GOTERM_BP_FAT	GO:0010608~posttranscriptional regulation of gene expression	9	2.0362	0.0220112	EIF4E, ZCCHC11, CCDC88C, IREB2, IGF2BP1, DAZL, PUM2, LIN28A, QK	316	148	13588	2.61486	1	0.408749	31.299
GOTERM_BP_FAT	GO:0007276~gamete generation	15	3.39367	0.0225705	RAD23B, HMGB2, RHOX5, AGFG1, TGFBR1, KIT, ZFP148, SIRT1, SOHLH2, QK, REC8, TCFL5, STRA8, TIAL1, DAZL	316	331	13588	1.94864	1	0.412357	31.9587
GOTERM_BP_FAT	GO:0048878~chemical homeostasis	16	3.61991	0.0233868	KCNMB4, GCLC, NF1, CLSTN1, IREB2, PDE3B, FKBP1A, ABCB7, GCLM, QK, HIF1A, TSC1, ATP2C1, FYN, COL4A3BP, DLG1	316	365	13588	1.88493	1	0.419373	32.9108
GOTERM_BP_FAT	GO:0016569~covalent chromatin modification	7	1.58371	0.0240935	BMI1, SUZ12, TAF1, SATB1, EED, SIRT1, SUV39H2	316	96	13588	3.13542	1	0.424667	33.725
GOTERM_BP_FAT	GO:0006508~proteolysis	35	7.91855	0.0243584	RAD23B, METAP1, METAP2, XIAP, IDE, MME, RLIM, FBXL19, SUMO3, CUL5, PPP2CB, PITRM1, DPEP3, FBXO25, ZMPSTE24, VCPIP1, TBL1XR1, UFD1L, UBR3, HERC3, TOPORS, UBE2Q2, UBE2C, MARCH6, TRIM33, ATG4C, RNF5, UBE2K, PSMA4, UCHL5, RNF139, UBE2W, ASB3, FBXO33, CHFR	316	1034	13588	1.45551	1	0.423975	34.0277
GOTERM_BP_FAT	GO:0008156~negative regulation of DNA replication	3	0.678733	0.025662	STRA8, GMNN, HUS1	316	11	13588	11.7273	1	0.43671	35.4989
GOTERM_BP_FAT	GO:0032228~regulation of synaptic transmission, GABAergic	3	0.678733	0.025662	NRAS, KRAS, NF1	316	11	13588	11.7273	1	0.43671	35.4989
GOTERM_BP_FAT	GO:0008354~germ cell migration	3	0.678733	0.025662	RHOX5, TGFBR1, KIT	316	11	13588	11.7273	1	0.43671	35.4989
GOTERM_BP_FAT	GO:0035270~endocrine system development	6	1.35747	0.0256741	GATA2, CRKL, CREB1, TGFBR1, NF1, PDE3B	316	72	13588	3.58333	1	0.432703	35.5124
GOTERM_BP_FAT	GO:0015758~glucose transport	4	0.904977	0.026347	SLC2A3, SORT1, STXBP3A, YES1	316	28	13588	6.14286	1	0.437049	36.2595
GOTERM_BP_FAT	GO:0043069~negative regulation of programmed cell death	12	2.71493	0.02718	BMI1, MSX2, NRAS, GCLC, KRAS, XIAP, RRN3, TGFBR1, PPP2CB, MAPK8, KIT, GCLM	316	244	13588	2.11475	1	0.443211	37.1731
GOTERM_BP_FAT	GO:0060548~negative regulation of cell death	12	2.71493	0.0277022	BMI1, MSX2, NRAS, GCLC, KRAS, XIAP, RRN3, TGFBR1, PPP2CB, MAPK8, KIT, GCLM	316	245	13588	2.10612	1	0.445456	37.7395
GOTERM_BP_FAT	GO:0006417~regulation of translation	7	1.58371	0.0287246	EIF4E, IREB2, IGF2BP1, DAZL, PUM2, LIN28A, QK	316	100	13588	3.01	1	0.453505	38.8346
GOTERM_BP_FAT	GO:0007281~germ cell development	7	1.58371	0.0299677	REC8, HMGB2, STRA8, AGFG1, TIAL1, DAZL, KIT	316	101	13588	2.9802	1	0.463764	40.1416
GOTERM_BP_FAT	GO:0032268~regulation of cellular protein metabolic process	13	2.94118	0.0301354	BMP2, EIF4E, GCLC, CCDC88C, IREB2, RNF139, RAB23, IGF2BP1, DAZL, FKBP1A, PUM2, LIN28A, QK	316	280	13588	1.99643	1	0.461658	40.3159
GOTERM_BP_FAT	GO:0008645~hexose transport	4	0.904977	0.03157	SLC2A3, SORT1, STXBP3A, YES1	316	30	13588	5.73333	1	0.473541	41.7877
GOTERM_BP_FAT	GO:0048705~skeletal system morphogenesis	8	1.80995	0.0317153	BMI1, SGPL1, RYK, TGFBR1, INSIG1, DLG1, PEX7, PLEKHA1	316	130	13588	2.64615	1	0.47117	41.9348
GOTERM_BP_FAT	GO:0070647~protein modification by small protein conjugation or removal	7	1.58371	0.0339068	BMI1, SUZ12, SUMO3, TRIM33, UBE2C, CHFR, VCPIP1	316	104	13588	2.89423	1	0.490354	44.112
GOTERM_BP_FAT	GO:0015749~monosaccharide transport	4	0.904977	0.0343695	SLC2A3, SORT1, STXBP3A, YES1	316	31	13588	5.54839	1	0.491167	44.5618
GOTERM_BP_FAT	GO:0043547~positive regulation of GTPase activity	3	0.678733	0.0353042	NDEL1, RALBP1, NF1	316	13	13588	9.92308	1	0.496686	45.46
GOTERM_BP_FAT	GO:0001508~regulation of action potential	5	1.13122	0.0362064	KCNMB4, TSC1, FYN, NF1, QK	316	54	13588	3.98148	1	0.501717	46.314
GOTERM_BP_FAT	GO:0007264~small GTPase mediated signal transduction	12	2.71493	0.0380713	NRAS, KRAS, RALBP1, ROCK2, RAB28, NF1, RAB23, RAP1A, RAP1B, RAB6B, RAB9, ELMO1	316	258	13588	2	1	0.515731	48.0394
GOTERM_BP_FAT	GO:0030036~actin cytoskeleton organization	9	2.0362	0.0384941	NRAS, KRAS, ATP2C1, ROCK2, TRPM7, NF1, ABL2, DLG1, ELMO1	316	165	13588	2.34545	1	0.515848	48.4233
GOTERM_BP_FAT	GO:0031570~DNA integrity checkpoint	4	0.904977	0.0403401	CCND1, XPC, STRA8, HUS1	316	33	13588	5.21212	1	0.5289	50.0683
GOTERM_BP_FAT	GO:0007010~cytoskeleton organization	14	3.16742	0.0403427	ABLIM1, AGFG1, TRPM7, ROCK2, NF1, ELMO1, NRAS, NDEL1, KRAS, ATP2C1, CNTROB, ABL2, SPAST, DLG1	316	326	13588	1.84663	1	0.525136	50.0706
GOTERM_BP_FAT	GO:0045685~regulation of glial cell differentiation	3	0.678733	0.040569	BMP2, NF1, ID4	316	14	13588	9.21429	1	0.523415	50.2688
GOTERM_BP_FAT	GO:0014013~regulation of gliogenesis	3	0.678733	0.040569	BMP2, NF1, ID4	316	14	13588	9.21429	1	0.523415	50.2688
GOTERM_BP_FAT	GO:0001837~epithelial to mesenchymal transition	3	0.678733	0.040569	BMP2, HIF1A, PPP3R1	316	14	13588	9.21429	1	0.523415	50.2688
GOTERM_BP_FAT	GO:0007292~female gamete generation	5	1.13122	0.0405847	REC8, STRA8, DAZL, SIRT1, SOHLH2	316	56	13588	3.83929	1	0.519861	50.2826
GOTERM_BP_FAT	GO:0051052~regulation of DNA metabolic process	5	1.13122	0.0452506	STRA8, GMNN, CEBPG, HUS1, PCNA	316	58	13588	3.7069	1	0.555833	54.2072
GOTERM_BP_FAT	GO:0009411~response to UV	4	0.904977	0.0467982	HMGN1, XPC, HUS1, MAPK8	316	35	13588	4.91429	1	0.564567	55.4432
GOTERM_BP_FAT	GO:0032868~response to insulin stimulus	5	1.13122	0.0476913	PHIP, PDE3B, SORT1, STXBP3A, AKT3	316	59	13588	3.64407	1	0.567907	56.1421
GOTERM_BP_FAT	GO:0007265~Ras protein signal transduction	5	1.13122	0.0476913	NRAS, KRAS, ROCK2, NF1, ELMO1	316	59	13588	3.64407	1	0.567907	56.1421
GOTERM_BP_FAT	GO:0010605~negative regulation of macromolecule metabolic process	19	4.29864	0.0479738	BMI1, TBL1XR1, SATB1, ZCCHC11, GCLC, RHOX5, GMNN, HUS1, RBL1, ERI1, FKBP1A, RB1, LIN28A, MBD2, SIRT1, SUZ12, SALL4, STRA8, RAB23	316	506	13588	1.61462	1	0.566458	56.3611
GOTERM_BP_FAT	GO:0048610~reproductive cellular process	9	2.0362	0.0485379	REC8, HMGB2, RHOX5, STRA8, AGFG1, TIAL1, TGFBR1, DAZL, KIT	316	173	13588	2.23699	1	0.567195	56.7952
GOTERM_BP_FAT	GO:0006936~muscle contraction	5	1.13122	0.0502036	COL4A3BP, CAMK2D, FKBP1A, HOMER1, DLG1	316	60	13588	3.58333	1	0.576186	58.0534
GOTERM_BP_FAT	GO:0032844~regulation of homeostatic process	5	1.13122	0.0502036	GCLC, HIF1A, NF1, FKBP1A, GCLM	316	60	13588	3.58333	1	0.576186	58.0534
GOTERM_BP_FAT	GO:0070507~regulation of microtubule cytoskeleton organization	4	0.904977	0.0502066	PLK4, ROCK2, MAPRE1, CLASP2	316	36	13588	4.77778	1	0.572661	58.0555
GOTERM_BP_FAT	GO:0006979~response to oxidative stress	6	1.35747	0.051475	GCLC, HIF1A, MAP2K1, GATM, PPP2CB, GCLM	316	87	13588	2.96552	1	0.578463	58.9904
GOTERM_BP_FAT	GO:0043066~negative regulation of apoptosis	11	2.48869	0.0516718	BMI1, MSX2, NRAS, GCLC, KRAS, XIAP, RRN3, TGFBR1, PPP2CB, MAPK8, GCLM	316	239	13588	1.97908	1	0.576406	59.1337
GOTERM_BP_FAT	GO:0030029~actin filament-based process	9	2.0362	0.0527059	NRAS, KRAS, ATP2C1, ROCK2, TRPM7, NF1, ABL2, DLG1, ELMO1	316	176	13588	2.19886	1	0.580367	59.8789
GOTERM_BP_FAT	GO:0001892~embryonic placenta development	5	1.13122	0.0527874	GATA2, PLK4, HIF1A, MAP2K1, SP3	316	61	13588	3.52459	1	0.577525	59.937
GOTERM_BP_FAT	GO:0051327~M phase of meiotic cell cycle	6	1.35747	0.0535884	REC8, STRA8, NEK2, RBM7, CLASP2, SUV39H2	316	88	13588	2.93182	1	0.579775	60.5047
GOTERM_BP_FAT	GO:0007126~meiosis	6	1.35747	0.0535884	REC8, STRA8, NEK2, RBM7, CLASP2, SUV39H2	316	88	13588	2.93182	1	0.579775	60.5047
GOTERM_BP_FAT	GO:0018212~peptidyl-tyrosine modification	4	0.904977	0.0537323	TYK2, FYN, KIT, ABL2	316	37	13588	4.64865	1	0.577422	60.6058
GOTERM_BP_FAT	GO:0018108~peptidyl-tyrosine phosphorylation	4	0.904977	0.0537323	TYK2, FYN, KIT, ABL2	316	37	13588	4.64865	1	0.577422	60.6058
GOTERM_BP_FAT	GO:0042552~myelination	4	0.904977	0.0537323	TSC1, FYN, NF1, QK	316	37	13588	4.64865	1	0.577422	60.6058
GOTERM_BP_FAT	GO:0006730~one-carbon metabolic process	7	1.58371	0.0547562	PRMT3, SUZ12, MTHFD1, SATB1, MAT2A, EED, SUV39H2	316	117	13588	2.57265	1	0.581167	61.3187
GOTERM_BP_FAT	GO:0046519~sphingoid metabolic process	4	0.904977	0.0573737	SAMD8, SGPL1, SGPP1, COL4A3BP	316	38	13588	4.52632	1	0.595422	63.0862
GOTERM_BP_FAT	GO:0051321~meiotic cell cycle	6	1.35747	0.0579647	REC8, STRA8, NEK2, RBM7, CLASP2, SUV39H2	316	90	13588	2.86667	1	0.596004	63.4746
GOTERM_BP_FAT	GO:0007272~ensheathment of neurons	4	0.904977	0.061129	TSC1, FYN, NF1, QK	316	39	13588	4.41026	1	0.612852	65.4897
GOTERM_BP_FAT	GO:0048477~oogenesis	4	0.904977	0.061129	REC8, STRA8, DAZL, SOHLH2	316	39	13588	4.41026	1	0.612852	65.4897
GOTERM_BP_FAT	GO:0008366~axon ensheathment	4	0.904977	0.061129	TSC1, FYN, NF1, QK	316	39	13588	4.41026	1	0.612852	65.4897
GOTERM_BP_FAT	GO:0010035~response to inorganic substance	6	1.35747	0.0625398	KCNMB4, CCND1, GCLC, GATM, PPP2CB, MAPK8	316	92	13588	2.80435	1	0.618273	66.3541
GOTERM_BP_FAT	GO:0006260~DNA replication	8	1.80995	0.0637719	POLD3, RFC5, CDC45, STRA8, PCNA, POT1A, PAPD5, DSCC1	316	152	13588	2.26316	1	0.622474	67.0922
GOTERM_BP_FAT	GO:0006259~DNA metabolic process	16	3.61991	0.0661147	HMGN1, RAD23B, HMGB2, HUS1, POT1A, PAPD5, INTS3, POLD3, RFC5, CDC45, XPC, RAD21, STRA8, EEF1E1, PCNA, DSCC1	316	421	13588	1.6342	1	0.633017	68.4539
GOTERM_BP_FAT	GO:0006790~sulfur metabolic process	6	1.35747	0.0673133	MTHFD1, GCLC, MAT2A, LIPT2, GCLM, HS2ST1	316	94	13588	2.74468	1	0.636701	69.1299
GOTERM_BP_FAT	GO:0019953~sexual reproduction	15	3.39367	0.06743	RAD23B, HMGB2, RHOX5, AGFG1, TGFBR1, KIT, ZFP148, SIRT1, SOHLH2, QK, REC8, TCFL5, STRA8, TIAL1, DAZL	316	386	13588	1.67098	1	0.634231	69.195
GOTERM_BP_FAT	GO:0035022~positive regulation of Rac protein signal transduction	2	0.452489	0.0679518	NRAS, KRAS	316	3	13588	28.6667	1	0.634064	69.4844
GOTERM_BP_FAT	GO:0051900~regulation of mitochondrial depolarization	2	0.452489	0.0679518	GCLC, GCLM	316	3	13588	28.6667	1	0.634064	69.4844
GOTERM_BP_FAT	GO:0048712~negative regulation of astrocyte differentiation	2	0.452489	0.0679518	NF1, ID4	316	3	13588	28.6667	1	0.634064	69.4844
GOTERM_BP_FAT	GO:0043089~positive regulation of Cdc42 GTPase activity	2	0.452489	0.0679518	NDEL1, RALBP1	316	3	13588	28.6667	1	0.634064	69.4844
GOTERM_BP_FAT	GO:0032489~regulation of Cdc42 protein signal transduction	2	0.452489	0.0679518	NDEL1, RALBP1	316	3	13588	28.6667	1	0.634064	69.4844
GOTERM_BP_FAT	GO:0010586~miRNA metabolic process	2	0.452489	0.0679518	ZCCHC11, LIN28A	316	3	13588	28.6667	1	0.634064	69.4844
GOTERM_BP_FAT	GO:0043088~regulation of Cdc42 GTPase activity	2	0.452489	0.0679518	NDEL1, RALBP1	316	3	13588	28.6667	1	0.634064	69.4844
GOTERM_BP_FAT	GO:0010587~miRNA catabolic process	2	0.452489	0.0679518	ZCCHC11, LIN28A	316	3	13588	28.6667	1	0.634064	69.4844
GOTERM_BP_FAT	GO:0003012~muscle system process	5	1.13122	0.0697714	COL4A3BP, CAMK2D, FKBP1A, HOMER1, DLG1	316	67	13588	3.20896	1	0.641061	70.4739
GOTERM_BP_FAT	GO:0043434~response to peptide hormone stimulus	6	1.35747	0.0697741	PHIP, GATM, PDE3B, SORT1, STXBP3A, AKT3	316	95	13588	2.71579	1	0.638023	70.4752
GOTERM_BP_FAT	GO:0048169~regulation of long-term neuronal synaptic plasticity	3	0.678733	0.0707061	NRAS, KRAS, NF1	316	19	13588	6.78947	1	0.640059	70.9703
GOTERM_BP_FAT	GO:0048232~male gamete generation	11	2.48869	0.0715261	RAD23B, REC8, HMGB2, STRA8, AGFG1, TCFL5, DAZL, KIT, SIRT1, SOHLH2, QK	316	255	13588	1.8549	1	0.641458	71.3993
GOTERM_BP_FAT	GO:0007283~spermatogenesis	11	2.48869	0.0715261	RAD23B, REC8, HMGB2, STRA8, AGFG1, TCFL5, DAZL, KIT, SIRT1, SOHLH2, QK	316	255	13588	1.8549	1	0.641458	71.3993
GOTERM_BP_FAT	GO:0016192~vesicle-mediated transport	17	3.84615	0.0761842	KDELR2, ARFGAP3, CNIH, GOLT1B, LIN7C, ELMO1, LLGL2, NRAS, GATA2, RIN2, SORT1, RAB6B, VAMP2, STXBP3A, VPS26A, SPAST, EPN2	316	466	13588	1.56867	1	0.662567	73.7255
GOTERM_BP_FAT	GO:0051053~negative regulation of DNA metabolic process	3	0.678733	0.0773956	STRA8, GMNN, HUS1	316	20	13588	6.45	1	0.665643	74.3007
GOTERM_BP_FAT	GO:0000041~transition metal ion transport	5	1.13122	0.0791948	MMGT1, SLC39A10, ATP2C1, SLC39A9, SLC30A9	316	70	13588	3.07143	1	0.67149	75.133
GOTERM_BP_FAT	GO:0040029~regulation of gene expression, epigenetic	5	1.13122	0.0791948	ZCCHC11, XIST, EED, LIN28A, SIRT1	316	70	13588	3.07143	1	0.67149	75.133
GOTERM_BP_FAT	GO:0015031~protein transport	22	4.97738	0.0793025	KDELR2, ARFGAP3, NACA, NUP160, SNX27, GOLT1B, MTX2, UNC50, LIN7C, IPO8, RAB9, PEX7, RAB11FIP3, ATG4C, PCNA, RAB23, NOP58, RAB6B, GLE1, STXBP3A, VPS26A, SEC61A2	316	651	13588	1.45315	1	0.669116	75.182
GOTERM_BP_FAT	GO:0051493~regulation of cytoskeleton organization	6	1.35747	0.0801065	ACTR3, PLK4, ROCK2, MAPRE1, CLASP2, DLG1	316	99	13588	2.60606	1	0.670095	75.5451
GOTERM_BP_FAT	GO:0043414~biopolymer methylation	5	1.13122	0.0824699	PRMT3, SUZ12, SATB1, EED, SUV39H2	316	71	13588	3.02817	1	0.678338	76.5835
GOTERM_BP_FAT	GO:0045184~establishment of protein localization	22	4.97738	0.084099	KDELR2, ARFGAP3, NACA, NUP160, SNX27, GOLT1B, MTX2, UNC50, LIN7C, IPO8, RAB9, PEX7, RAB11FIP3, ATG4C, PCNA, RAB23, NOP58, RAB6B, GLE1, STXBP3A, VPS26A, SEC61A2	316	656	13588	1.44207	1	0.682973	77.2749
GOTERM_BP_FAT	GO:0007018~microtubule-based movement	6	1.35747	0.0855631	DYNC1LI1, KIF2C, NDEL1, TUBA3B, TUBA3A, KIF15, KIF26A	316	101	13588	2.55446	1	0.686752	77.8799
GOTERM_BP_FAT	GO:0032886~regulation of microtubule-based process	4	0.904977	0.0859343	PLK4, ROCK2, MAPRE1, CLASP2	316	45	13588	3.82222	1	0.685634	78.0309
GOTERM_BP_FAT	GO:0033554~cellular response to stress	15	3.39367	0.0887174	HMGN1, RAD23B, CCND1, HMGB2, RAD21, HIF1A, XPC, EEF1E1, COL4A3BP, HUS1, PCNA, MAPK8, TOPORS, INTS3, SIRT1	316	404	13588	1.59653	1	0.695008	79.1323
GOTERM_BP_FAT	GO:0034661~ncRNA catabolic process	2	0.452489	0.0895635	ZCCHC11, LIN28A	316	4	13588	21.5	1	0.695899	79.4567
GOTERM_BP_FAT	GO:0006829~zinc ion transport	3	0.678733	0.0913312	SLC39A10, SLC39A9, SLC30A9	316	22	13588	5.86364	1	0.700623	80.1192
GOTERM_BP_FAT	GO:0048538~thymus development	3	0.678733	0.0913312	CCNB2, CRKL, TGFBR1	316	22	13588	5.86364	1	0.700623	80.1192
GOTERM_BP_FAT	GO:0030261~chromosome condensation	3	0.678733	0.0913312	STRA8, CDCA5, NCAPD2	316	22	13588	5.86364	1	0.700623	80.1192
GOTERM_BP_FAT	GO:0009069~serine family amino acid metabolic process	3	0.678733	0.0913312	GCLC, GCLM, GLDC	316	22	13588	5.86364	1	0.700623	80.1192
GOTERM_BP_FAT	GO:0031099~regeneration	3	0.678733	0.0985531	GATM, ATIC, MTPN	316	23	13588	5.6087	1	0.72663	82.6227
GOTERM_BP_FAT	GO:0042398~cellular amino acid derivative biosynthetic process	4	0.904977	0.0996969	GCLC, MAT2A, GATM, GCLM	316	48	13588	3.58333	1	0.728343	82.9909
